1

2

3

4 A 4-year review of amniocentesis at a tertiary hospital in Ethiopia: an experience  
5 from a LMIC

6

7

8 Haile G. Mekuria<sup>1\*</sup>, Hilkiah K. Suga<sup>2†</sup>, Gadise Bekele<sup>3</sup>

9

10 <sup>1</sup>Department of Obstetrics and Gynecology, Myungsung Medical College/MCM  
11 Comprehensive Specialized Hospital, Addis Ababa, Ethiopia

12 <sup>2</sup>Department of Research, Blue Health Medical Consultancy, Addis Ababa, Ethiopia

13 <sup>3</sup>Department of Biostatistics, Addis Continental Institute of Public Health, Addis Ababa,  
14 Ethiopia

15

16 \*First author

17 †Corresponding author: [hilkms@gmail.com](mailto:hilkms@gmail.com)

## 18 Abstract

19 Background: Amniocentesis is a technique for withdrawing amniotic fluid from the  
20 uterine cavity using a needle via a trans-abdominal approach. It has multiple diagnostic  
21 and therapeutic uses such as prenatal genetic studies and amnioreduction for  
22 polyhydramnios. The commonest indications are advanced maternal age and increased  
23 risk on maternal serum screening. The objective of this study is to review the common  
24 indications, outcomes and complications of amniocentesis at a tertiary hospital in  
25 Ethiopia.

26 Methods: A retrospective cross-sectional study was conducted at a tertiary hospital in  
27 Ethiopia. Data was collected from the Fetomaternal division's log records and follow-up  
28 charts during the time period of 2019 to 2022. All records of patients who had  
29 amniocentesis done were included in the study. Socio-demographic information and  
30 obstetric history and variables related to the procedures were retrieved. Descriptive  
31 statistics was done using the software IBM Statistical Package for Social Sciences  
32 (SPSS) version 25.

33 Results: A total of 35 patients' records were reviewed. The mean maternal age was 32  
34 years (range, 19 – 43 years). The mean gestational age was 20.9 weeks (SD  $\pm$  2.2).  
35 The commonest indications for amniocentesis were previous history of Down syndrome  
36 (11%), advanced maternal age (9%) and QUAD 1:200 for Down syndrome (6%).  
37 Karyotype test was done in 29 of the 35 amniocentesis cases which was normal in 72%  
38 of the cases, 17% had Trisomy-21 and 11% had Trisomy-18. Fifty-two percent of the  
39 pregnancy had a live full term delivery and 25% of the cases terminated the pregnancy.

40 Conclusion: The most common indications for amniocentesis in Ethiopia were abnormal  
41 ultrasound finding, advanced maternal age and abnormal QUAD test results. Around a  
42 quarter of the genetic tests which were done after the procedure had chromosomal  
43 abnormalities, from which, the majority were terminated. There was no complication  
44 related to the procedure.

45 Keywords: amniocentesis, advanced maternal age, prenatal genetic study,  
46 chromosomal abnormality, fetomaternal complication

## 47 Introduction

48 Amniocentesis is a technique for withdrawing amniotic fluid from the uterine cavity using  
49 a needle via a trans-abdominal approach. Amniocentesis has been widely used since it  
50 was first performed in 1956. Originally reported as a method of determining fetal sex in  
51 utero, Fuchs and Riis then hypothesized that it could be possible to diagnose  
52 chromosomal abnormalities in utero via this technique. By 1963, it had been confirmed  
53 that the karyotype of fetal and amniotic cells are identical (1 – 3).

54 The most common diagnostic indications for obtaining amniotic fluid are prenatal  
55 genetic studies and assessment of fetal lung maturity. Other indications include, but are  
56 not limited to, evaluation of the fetus for infection, degree of hemolytic anemia, blood or  
57 platelet type, hemoglobinopathy, and neural tube defects. Risks include spontaneous  
58 abortion, infection, needle injuries, and preterm labor (4, 5).

59 Amniocentesis is also performed as a therapeutic procedure to remove excess amniotic  
60 fluid, such as in symptomatic polyhydramnios or twin-twin transfusion syndrome, or to  
61 reduce volume and pressure of amniotic fluid in cases of prolapsed fetal membranes in  
62 the second trimester to facilitate placement of an emergency cerclage.(6, 7)

63 Since the late 1960s, amniocentesis has become a widely accepted method of  
64 obtaining fetal genetic information (8). Amniocentesis for prenatal genetic studies is  
65 technically possible at any gestational age after approximately 11 weeks of gestation,  
66 but is optimally performed after 15 to 17 weeks of gestation. Procedures performed  
67 before 15 weeks (ie, early amniocentesis) are associated with higher fetal loss and  
68 complication rates, including culture failure, and should be avoided. Later procedures

69 can be problematic if termination of pregnancy is planned based upon abnormal results.  
70 Although some pain is associated with amniocentesis, it is generally well tolerated  
71 without the need for anesthesia (8, 9).

72 Maternal age over 35 is the most common indication for amniocentesis (10). It is  
73 conventionally performed between 16 – 24 weeks. The chances of late-onset  
74 abnormalities after 1st and 2nd-trimester ultrasound examinations are estimated at  
75 5.5%-17% (11).

76 Counseling about the risk and benefit of the procedure is very important as some  
77 women may decline the procedure if they don't want to terminate the pregnancy  
78 whatever the result is. Others, even if they don't want to terminate the pregnancy, they  
79 accept the procedure to prepare themselves for the care of the baby after delivery (12).

80 Prenatal chromosomal microarray analysis is recommended for a patient with a fetus  
81 with one or more major structural abnormalities identified on ultrasonographic  
82 examination and who is undergoing invasive prenatal diagnosis (13).

83 Even though the procedure is more than 6 decades old, as far as the authors search  
84 goes, this report is the first of its kind from an experience located in the Eastern Africa.  
85 This study aims to review the common indications and outcomes of prenatal diagnostic  
86 amniocentesis and its complications at a tertiary center in Ethiopia.

## 87 Methods

88 A retrospective cross-sectional study was conducted at the Fetomaternal division,  
89 Department of Obstetrics and Gynecology, MCM Comprehensive Specialized Hospital,

90 Addis Ababa, Ethiopia. The department is one of the few in the country that gives  
91 prenatal amniocentesis service. Data was collected from the division's log records and  
92 follow-up charts which was abstracted from 2019 to 2022. Study period was from June  
93 1<sup>st</sup> to 30<sup>th</sup>, 2023. Records of all patients who had prenatal amniocentesis done during  
94 the timeframe were included in the study. The following variables were collected:  
95 indication, maternal age, gestational age, needle size, BMI, pregnancy outcome, result  
96 of the genetic test, presence of vaginal bleeding post-procedure, presence of  
97 amnionitis. The procedures were carried out by the same fetomaternal specialist using  
98 the same ultrasound guided techniques. IBM Statistical Package for Social Sciences  
99 (SPSS) version 25 was used to compute descriptive statistics.

100 Ethical approval was obtained prior to the data collection and the investigators did not  
101 collect personal identification information of the patients.

## 102 Results

103 A total of 35 women had amniocentesis between 2019 and 2022 with the mean  
104 maternal age was 32 years (range, 19 – 43 years). The mean gestational age was 20.9  
105 weeks (SD  $\pm$  2.2, range 17 – 25) and mean maternal BMI was 21 kg/m<sup>2</sup> (SD  $\pm$  2.4). In  
106 23 patients, 20 Gauge needle was used and 22 Gauge was used in the others. The  
107 needle insertion to the probe angle was perpendicular in 30 of the procedures (85%)  
108 and parallel in 5 of the procedures (15%).

109 The commonest indications were previous history of down syndrome (11%), advanced  
110 maternal age (9%), cleft lip (6%), history of Recurrent pregnancy loss or RPL (6%),

111 hydrocephalus (6%), non-immune hydrops (6%), omphalocele (6%), QUAD 1:200 for  
112 down syndrome (6%).

113 Karyotype test was done in 29 of the 35 amniocentesis cases. Karyotype results were  
114 normal in 72% of cases (21/29), Trisomy-21 in 17% (5/29) and Trisomy-18 in 11%  
115 (3/29). Almost half (52%) of the cases had a live birth, 46% (16/35) had a term delivery  
116 and 6% (2/35) had a preterm delivery. Stillbirth or miscarriage occurred in 17% (6/35),  
117 25% (9/35) of the cases terminated the pregnancy and the outcome was not known in  
118 6% (2/35) of the cases. Pathological ultrasonography has the highest positive detection  
119 rate (30%)

## 120 Discussion

121 Amniocentesis is generally done after the 15th gestational week with a miscarriage risk  
122 of less than 1% (14, 15). The risk of spontaneous fetal losses following amniocentesis  
123 performed before this gestational age increases (16). Likewise, the patients in our study  
124 were between the gestational age of 17 and 25 weeks, which were under the accepted  
125 gestational age range.

126 Currently twenty and twenty-two gauge needles are commonly used and in this study,  
127 two-third of the procedure was done using a 20G needle. The larger needle size i.e.  
128 20G is associated with significantly shorter duration of amniocentesis. However, there is  
129 no significant difference in the intrauterine bleeding at the insertion site and fetal loss  
130 (17, 18). Likewise, none of the patients in this study had documented intrauterine  
131 bleeding in both groups (20G vs 22G).

132 A study done in South East China that did a retrospective analysis on more than 4700  
133 patients who had an amniocentesis showed the commonest indications for  
134 amniocentesis were increased risk on maternal serum screenings and advanced  
135 maternal age. They are indications for 86% of the procedures (5). Another 5 year  
136 reviews from Malaysia and China hospitals showed similar findings i.e. both indications  
137 accounted for more than half of the total procedures (19, 20). Other common indications  
138 include poor obstetric history, pathological ultrasonography findings and positive results  
139 from non-invasive prenatal testing. However, in our study, the majority of indication for  
140 amniocentesis was done due to the pathological ultrasonography findings (57% vs 12%  
141 or 4%) followed by previous Down syndrome baby and increased risk on maternal  
142 serum screenings, each accounted for 11% of the procedures. Advanced maternal age  
143 was an indication in only 9% of cases.

144 Positive detection rate of pathological ultrasonography for chromosomal abnormalities is  
145 less than 15% (19, 20). Noninvasive prenatal DNA testing has the highest positive  
146 detection rate with greater than 40% (42% and 53%). In our study, pathological  
147 ultrasonography has the highest positive detection rate (30%).

#### 148 Conclusion

149 A review of the first 5 years of amniocentesis at our center showed that the most  
150 common indication to the procedure was abnormal ultrasound finding. Advanced  
151 maternal age and abnormal QUAD test results were also among the common  
152 indications. Around a quarter of the genetic tests which were done after the procedure  
153 had chromosomal abnormalities, from which, the majority were terminated. There was

154 no complication related to the procedure. Further study is required to understand more  
155 fetomaternal complications of amniocentesis in Ethiopia.



156 Reference

- 157 (1) FUCHS F, RIIS P. Antenatal sex determination. *Nature*. 1956 Feb 18;177  
158 (4503):330. doi: 10.1038/177330a0. PMID: 13297032.
- 159 (2) Connolly KA, Eddleman KA. Amniocentesis: A contemporary review. *World J Obstet*  
160 *Gynecol* 2016; 5(1): 58-65 [DOI: 10.5317/wjog.v5.i1.58]
- 161 (3) Steele MW, Breg WR Jr. Chromosome analysis of human amniotic-fluid cells.  
162 *Lancet*. 1966 Feb 19;1(7434):383-5. doi: 10.1016/s0140-6736(66)91387-0. PMID:  
163 4159775.
- 164 (4) Bornstein E, Lenchner E, Donnenfeld A, Barnhard Y, Seubert D, Divon MY.  
165 Advanced maternal age as a sole indication for genetic amniocentesis; risk-benefit  
166 analysis based on a large database reflecting the current common practice. *J Perinat*  
167 *Med*. 2009;37(2):99-102. doi: 10.1515/JPM.2009.032. PMID: 18999912.
- 168 (5) Tao H, Xiao J, Yang C, Wang J, Tang Y, Guo C, Wang J. Retrospective analysis of  
169 4761 cases who underwent amniocentesis in southeast China. *J Obstet Gynaecol*. 2018  
170 Jan;38(1):38-41. doi: 10.1080/01443615.2017.1326887. Epub 2017 Aug 1. PMID:  
171 28764586.
- 172 (6) Erfani H, Diaz-Rodriguez GE, Aalipour S, Nassr A, Rezaei A, Gandhi M, Mendez-  
173 Figueroa H, Aagaard KM, Shamshirsaz AA. Amnioreduction in cases of  
174 polyhydramnios: Indications and outcomes in singleton pregnancies without fetal  
175 interventions. *Eur J Obstet Gynecol Reprod Biol*. 2019 Oct;241:126-128. doi:  
176 10.1016/j.ejogrb.2019.05.019. Epub 2019 May 19. PMID: 31160132.
- 177 (7) Society for Maternal-Fetal Medicine (SMFM). Electronic address: [pubs@smfm.org](mailto:pubs@smfm.org);  
178 Dashe JS, Pressman EK, Hibbard JU. SMFM Consult Series #46: Evaluation and  
179 management of polyhydramnios. *Am J Obstet Gynecol*. 2018 Oct;219(4):B2-B8. doi:  
180 10.1016/j.ajog.2018.07.016. Epub 2018 Jul 23. PMID: 30048635.
- 181 (8) Daum H, Ben David A, Nadjari M, Zenvirt S, Helman S, Yanai N, Meiner V, Yagel S,  
182 Frumkin A, Shkedi Rafid S; collaborating authors. Role of late amniocentesis in the era  
183 of modern genomic technologies. *Ultrasound Obstet Gynecol*. 2019 May;53(5):676-685.  
184 doi: 10.1002/uog.20113. Epub 2019 Apr 12. PMID: 30155922.
- 185 (9) Practice Bulletin No. 162: Prenatal Diagnostic Testing for Genetic Disorders. *Obstet*  
186 *Gynecol*. 2016 May;127(5):e108-e122. doi: 10.1097/AOG.0000000000001405. PMID:  
187 26938573.

- 188 (10) Papp C, Papp Z. Chorionic villus sampling and amniocentesis: what are the risks in  
189 current practice? *Curr Opin Obstet Gynecol*. 2003 Apr;15(2):159-65. doi:  
190 10.1097/00001703-200304000-00011. PMID: 12634608.
- 191 (11) Quinlan MP. Amniocentesis: indications and risks. *Virtual Mentor*. 2008 May  
192 1;10(5):304-6. doi: 10.1001/virtualmentor.2008.10.5.cpr11-0805. PMID: 23211983.
- 193 (12) Bardin R, Hadar E, Haizler-Cohen L, Gabbay-Benziv R, Meizner I, Kahana S,  
194 Yeshaya J, Yacobson S, Cohen-Vig L, Agmon-Fishman I, Basel-Vanagaite L, Maya I.  
195 Cytogenetic analysis in fetuses with late onset abnormal sonographic findings. *J Perinat*  
196 *Med*. 2018 Nov 27;46(9):975-982. doi: 10.1515/jpm-2017-0071. PMID: 28915119.
- 197 (13) Committee on Genetics and the Society for Maternal-Fetal Medicine. Committee  
198 Opinion No.682: Microarrays and Next-Generation Sequencing Technology: The Use of  
199 Advanced Genetic Diagnostic Tools in Obstetrics and Gynecology. *Obstet Gynecol*.  
200 2016 Dec;128(6):e262-e268. doi: 10.1097/AOG.0000000000001817. PMID: 27875474.
- 201 (14) Odibo AO, Gray DL, Dicke JM, Stamilio DM, Macones GA, Crane JP. Revisiting the  
202 fetal loss rate after second-trimester genetic amniocentesis: a single center's 16-year  
203 experience. *Obstet Gynecol*. 2008 Mar;111(3):589-95. doi:  
204 10.1097/AOG.0b013e318162eb53. PMID: 18310360.
- 205 (15) Salomon LJ, Sotiriadis A, Wulff CB, Odibo A, Akolekar R. Risk of miscarriage  
206 following amniocentesis or chorionic villus sampling: systematic review of literature and  
207 updated meta-analysis. *Ultrasound Obstet Gynecol*. 2019 Oct;54(4):442-451. doi:  
208 10.1002/uog.20353. Epub 2019 Sep 6. PMID: 31124209.
- 209 (16) Saltvedt S, Almström H. Fetal loss rate after second trimester amniocentesis at  
210 different gestational age. *Acta Obstet Gynecol Scand*. 1999 Jan;78(1):10-4. PMID:  
211 9926885.
- 212 (17) Athanasiadis A, Petrakis P, Mikos T. Comparison of perinatal outcome after 2nd  
213 trimester amniocentesis using 22G and 20G needle. *Hippokratia*. 2017 Jan-  
214 Mar;21(1):60. PMID: 29904263; PMCID: PMC5997025.
- 215 (18) Athanasiadis AP, Pantazis K, Goulis DG, Chatzigeorgiou K, Vaitisi V,  
216 Assimakopoulos E, Tzeveleki F, Tsalikis T, Bontis JN. Comparison between 20G and  
217 22G needle for second trimester amniocentesis in terms of technical aspects and short-  
218 term complications. *Prenat Diagn* 2009; 29: 761-765 [PMID: 19412914 DOI:  
219 10.1002/pd.2283]
- 220 (19) Jummaat F, Ahmad S, Mohamed Ismail NA. 5-Year review on amniocentesis and  
221 its maternal fetal complications. *Horm Mol Biol Clin Investig*. 2019 Sep

222 20;40(2):/j/hmbci.2019.40.issue-2/hmbci-2019-0006/hmbci-2019-0006.xml. doi:  
223 10.1515/hmbci-2019-0006. PMID: 31539354.

224 (20) Liu Y, Sun XC, Lv GJ, Liu JH, Sun C, Mu K. Amniotic fluid karyotype analysis and  
225 prenatal diagnosis strategy of 3117 pregnant women with amniocentesis indication. J  
226 Comp Eff Res. 2023 May 31;12(6):e220168. doi: 10.57264/cer-2022-0168. Epub ahead  
227 of print. PMID: 37256256; PMCID: PMC10402904.

228

229

230 Table 1: A five year summary of genetic test results and indications for amniocentesis at  
 231 MCM Comprehensive Specialized Hospital, 2019 – 2022

| Genetic test result |                              |                                       | Number of cases | Percentage (denominator being the subtotal, %) | Percentage (denominator being the grand total, %) |
|---------------------|------------------------------|---------------------------------------|-----------------|------------------------------------------------|---------------------------------------------------|
| Normal Karyotype    | Indication for amniocentesis | Advanced maternal age                 | 2               | 9.52                                           | 5.71                                              |
|                     |                              | Pathological ultrasonography findings | 12              | 57.14                                          | 34.28                                             |
|                     |                              | History of recurrent pregnancy loss   | 1               | 4.76                                           | 2.86                                              |
|                     |                              | Previous history of MR baby           | 1               | 4.76                                           | 2.86                                              |
|                     |                              | Previous hx of Down Syndrome          | 4               | 19.05                                          | 11.43                                             |
|                     |                              | QUAD 1:200 for Down Syndrome          | 1               | 4.76                                           | 2.86                                              |
|                     | Total                        |                                       | 21              | 100                                            | 60                                                |
| Trisomy 21          | Indication for amniocentesis | Pathological ultrasonography findings | 5               | 100                                            | 14.29                                             |
|                     | Total                        |                                       | 5               | 100                                            | 14.29                                             |
| Trisomy 18          | Indication for amniocentesis | Pathological ultrasonography findings | 1               | 33.33                                          | 2.86                                              |
|                     |                              | History of still birth                | 1               | 33.33                                          | 2.86                                              |
|                     |                              | QUAD 1:10 for trisomy 18              | 1               | 33.33                                          | 2.86                                              |
| Total               |                              | 3                                     | 100             | 8.57                                           |                                                   |

|                       |                                 |                                             |     |       |      |
|-----------------------|---------------------------------|---------------------------------------------|-----|-------|------|
| Not<br>determine<br>d | Indication for<br>amniocentesis | Advanced maternal<br>age                    | 1   | 16.67 | 2.86 |
|                       |                                 | Pathological<br>ultrasonography<br>findings | 2   | 33.33 | 5.71 |
|                       |                                 | History of RPL                              | 1   | 16.67 | 2.86 |
|                       |                                 | QUAD 1:150 for Down<br>Syndrome             | 1   | 16.67 | 2.86 |
|                       |                                 | QUAD 1:200 for Down<br>Syndrome             | 1   | 16.67 | 2.86 |
|                       | Total                           | 6                                           | 100 | 17.14 |      |
| Grand total           |                                 |                                             | 35  |       | 100  |

232

233

234

235 Table 2: Pregnancy outcomes and genetic test results of women who had  
236 amniocentesis at MCM Comprehensive Specialized Hospital, 2019 – 2022

|                      |                  | Genetic test result |                     |                   | Total |
|----------------------|------------------|---------------------|---------------------|-------------------|-------|
|                      |                  | Normal              | Trisomy<br>18 or 21 | Not<br>determined |       |
| Pregnancy<br>outcome | Term delivery    | 12                  | 0                   | 4                 | 16    |
|                      | Preterm delivery | 2                   | 0                   | 0                 | 2     |
|                      | Terminated       | 1                   | 7                   | 1                 | 9     |
|                      | Still birth      | 5                   | 1                   | 0                 | 6     |
|                      | Unknown          | 1                   | 0                   | 1                 | 2     |
| Total                |                  | 21                  | 8                   | 6                 | 35    |

237
